# Supplementary material
Source: PubMed Central journal article supplement (PMC8338784)
Supplement: NIHMS1700607-supplement-5__Supplementary_Information.pdf [file NIHMS1700607-supplement-5__Supplementary_Information.pdf]

# Supplementary information for

## Sustained effects of rapidly-acting antidepressants require BDNF-dependent MeCP2 phosphorylation

Ji-Woon Kim, Anita E. Autry, Elisa S. Na, Megumi Adachi, Carl Bjorkholm, Ege T. Kavalali, and Lisa M. Monteggia\*

Correspondence to: [lisa.monteggia@vanderbilt.edu](mailto:lisa.monteggia@vanderbilt.edu)

### **This supplementary information includes:**

Supplementary Table 1

Supplementary Table 1

Fig. 1b

|              | Time   | Group | N number | Mean<br>±S.E.M | Statistics      | P-value<br>/Significance                          |
|--------------|--------|-------|----------|----------------|-----------------|---------------------------------------------------|
| BDNF/GAPDH   | 30 min | Sal   | 8        | 1.0 ± 0.05861  | Unpaired t-test | $t_{(13)} = 2.680$<br>$P = 0.0189 / *$            |
|              |        | Ket   | 7        | 1.326 ± 0.1119 |                 |                                                   |
|              | 7 days | Sal   | 9        | 1.0 ± 0.1363   | Unpaired t-test | $t_{(16)} = 0.5541$<br>$P = 0.5872 / \text{N.S.}$ |
|              |        | Ket   | 9        | 1.106 ± 0.1329 |                 |                                                   |
| pMeCP2/MeCP2 | 30 min | Sal   | 8        | 1.0 ± 0.09987  | Unpaired t-test | $t_{(14)} = 0.3760$<br>$P = 0.7126 / \text{N.S.}$ |
|              |        | Ket   | 8        | 1.075 ± 0.1727 |                 |                                                   |
|              | 7 days | Sal   | 9        | 1.0 ± 0.1381   | Unpaired t-test | $t_{(18)} = 2.765$<br>$P = 0.0127 / *$            |
|              |        | Ket   | 11       | 1.730 ± 0.2098 |                 |                                                   |

Fig. 1c

| Genotype        | Group | N number | Mean<br>±S.E.M | Statistics       | Interaction                           | Genotype factor                        | Drug factor                           | P-value<br>/Significance |
|-----------------|-------|----------|----------------|------------------|---------------------------------------|----------------------------------------|---------------------------------------|--------------------------|
| CTL             | Sal   | 10       | 177.5 ± 10.38  | Two-way<br>ANOVA | $F_{(1, 41)} = 1.170$<br>$P = 0.2857$ | $F_{(1, 41)} = 0.1077$<br>$P = 0.7445$ | $F_{(1, 41)} = 23.14$<br>$P < 0.0001$ | CTL: Sal vs Ket          |
|                 | Ket   | 10       | 96.00 ± 20.40  |                  |                                       |                                        |                                       | $P = 0.0016 / **$        |
| <i>Mecp2</i> KI | Sal   | 13       | 167.1 ± 9.839  |                  |                                       |                                        |                                       | KI: Sal vs Ket           |
|                 | Ket   | 12       | 115.5 ± 13.72  |                  |                                       |                                        |                                       | $P = 0.0378 / *$         |

Fig. 1d

| Genotype        | Group | N number | Mean<br>±S.E.M | Statistics       | Interaction                           | Genotype factor                       | Drug factor                           | P-value<br>/Significance   |
|-----------------|-------|----------|----------------|------------------|---------------------------------------|---------------------------------------|---------------------------------------|----------------------------|
| CTL             | Sal   | 9        | 193.3 ± 7.448  | Two-way<br>ANOVA | $F_{(1, 31)} = 5.798$<br>$P = 0.0222$ | $F_{(1, 31)} = 2.499$<br>$P = 0.1241$ | $F_{(1, 31)} = 4.502$<br>$P = 0.0420$ | CTL: Sal vs Ket            |
|                 | Ket   | 9        | 143.4 ± 17.71  |                  |                                       |                                       |                                       | $P = 0.0139 / *$           |
| <i>Mecp2</i> KI | Sal   | 9        | 184.2 ± 6.702  |                  |                                       |                                       |                                       | KI: Sal vs Ket             |
|                 | Ket   | 8        | 187.4 ± 7.329  |                  |                                       |                                       |                                       | $P = 0.9971 / \text{N.S.}$ |

Fig. 1e

| Genotype        | Group | N number | Mean<br>±S.E.M  | Statistics       | Interaction                           | Genotype factor                       | Drug factor                           | P-value<br>/Significance   |
|-----------------|-------|----------|-----------------|------------------|---------------------------------------|---------------------------------------|---------------------------------------|----------------------------|
| CTL             | Sal   | 13       | 1.0 ± 0.0994    | Two-way<br>ANOVA | $F_{(1, 45)} = 4.192$<br>$P = 0.0465$ | $F_{(1, 45)} = 8.757$<br>$P = 0.0049$ | $F_{(1, 45)} = 3.562$<br>$P = 0.0656$ | CTL: Sal vs Ket            |
|                 | Ket   | 13       | 1.459 ± 0.1414  |                  |                                       |                                       |                                       | $P = 0.0303 / *$           |
| <i>Bdnf</i> cKO | Sal   | 11       | 0.8936 ± 0.0996 |                  |                                       |                                       |                                       | cKO: Sal vs Ket            |
|                 | Ket   | 12       | 0.8749 ± 0.1142 |                  |                                       |                                       |                                       | $P = 0.9995 / \text{N.S.}$ |

**Fig. 1f**

| Genotype        | Group | N number | Mean ±S.E.M   | Statistics    | Interaction                          | Genotype factor                       | Drug factor                          | P-value /Significance                |
|-----------------|-------|----------|---------------|---------------|--------------------------------------|---------------------------------------|--------------------------------------|--------------------------------------|
| CTL             | Sal   | 12       | 196.4 ± 6.427 | Two-way ANOVA | $F_{(1,36)} = 4.290$<br>$P = 0.0456$ | $F_{(1,36)} = 0.2076$<br>$P = 0.6514$ | $F_{(1,36)} = 6.008$<br>$P = 0.0192$ | CTL: Sal vs Ket<br>$P = 0.0054 / **$ |
|                 | Ket   | 12       | 135.4 ± 15.59 |               |                                      |                                       |                                      |                                      |
| <i>Bdnf</i> cKO | Sal   | 8        | 174.6 ± 20.43 |               |                                      |                                       |                                      |                                      |
|                 | Ket   | 8        | 169.5 ± 5.913 |               |                                      |                                       |                                      |                                      |

**Fig. 2a**

| Group    | N number | Mean ±S.E.M   | Statistics      | P-value /Significance                      |
|----------|----------|---------------|-----------------|--------------------------------------------|
| ActD-Sal | 10       | 154.8 ± 10.87 | Unpaired t-test | $t_{(17)} = 0.7179$<br>$P = 0.4826 / N.S.$ |
| ActD-Ket | 9        | 165.4 ± 9.905 |                 |                                            |

**Fig. 2b**

| Time   | Group | N number | Mean ±S.E.M     | Statistics      | P-value /Significance                      |
|--------|-------|----------|-----------------|-----------------|--------------------------------------------|
| 30 min | Sal   | 8        | 1.0 ± 0.2228    | Unpaired t-test | $t_{(14)} = 1.039$<br>$P = 0.3165 / N.S.$  |
|        | Ket   | 8        | 1.345 ± 0.2458  |                 |                                            |
| 7 days | Sal   | 9        | 1.0 ± 0.2587    | Unpaired t-test | $t_{(16)} = 0.6954$<br>$P = 0.4968 / N.S.$ |
|        | Ket   | 9        | 0.7823 ± 0.1763 |                 |                                            |

**Fig. 2c**

| Genotype         | Group | N number | Mean ±S.E.M   | Statistics    | Interaction                          | Genotype factor                      | Drug factor                          | P-value /Significance                    |
|------------------|-------|----------|---------------|---------------|--------------------------------------|--------------------------------------|--------------------------------------|------------------------------------------|
| CTL              | Sal   | 9        | 137.7 ± 6.384 | Two-way ANOVA | $F_{(1,27)} = 1.954$<br>$P = 0.1735$ | $F_{(1,27)} = 6.927$<br>$P = 0.0139$ | $F_{(1,27)} = 33.39$<br>$P < 0.0001$ | CTL-Sal vs CTL-Ket<br>$P < 0.0001 / ***$ |
|                  | Ket   | 8        | 73.89 ± 10.46 |               |                                      |                                      |                                      |                                          |
| <i>Mef2c</i> cKO | Sal   | 7        | 101.9 ± 9.388 |               |                                      |                                      |                                      |                                          |
|                  | Ket   | 7        | 62.91 ± 9.271 |               |                                      |                                      |                                      |                                          |

**Fig. 2d**

| Genotype         | Group | N number | Mean ±S.E.M   | Statistics    | Interaction                           | Genotype factor                       | Drug factor                          | P-value /Significance                    |
|------------------|-------|----------|---------------|---------------|---------------------------------------|---------------------------------------|--------------------------------------|------------------------------------------|
| CTL              | Sal   | 9        | 144.6 ± 7.23  | Two-way ANOVA | $F_{(1,27)} = 0.0015$<br>$P = 0.9693$ | $F_{(1,27)} = 0.0913$<br>$P = 0.7649$ | $F_{(1,27)} = 100.7$<br>$P < 0.0001$ | CTL-Sal vs CTL-Ket<br>$P < 0.0001 / ***$ |
|                  | Ket   | 8        | 61.86 ± 6.518 |               |                                       |                                       |                                      |                                          |
| <i>Mef2c</i> cKO | Sal   | 7        | 141.8 ± 10.88 |               |                                       |                                       |                                      |                                          |
|                  | Ket   | 7        | 59.7 ± 8.228  |               |                                       |                                       |                                      |                                          |

**Fig. 3b-c**

| Pre-treatment | Perfusion | N number | Mean<br>±S.E.M | Statistics      | P-value<br>/Significance                                    |
|---------------|-----------|----------|----------------|-----------------|-------------------------------------------------------------|
| Sal(i.p.)     | ACSF      | 6        | 96.93 ± 2.701  | Unpaired t-test | Sal-ACSF vs Sal-Ket<br>$t_{(15)} = 5.683, P < 0.0001 / ***$ |
|               | Ket       | 11       | 116 ± 1.994    |                 | Ket-ACSF vs Ket-Ket<br>$t_{(16)} = 3.722, P = 0.0019 / **$  |
| Ket (i.p.)    | ACSF      | 8        | 96.04 ± 1.783  |                 | Sal-Ket vs Ket-Ket<br>$t_{(19)} = 2.404, P = 0.0266 / *$    |
|               | Ket       | 10       | 140.7 ± 10.57  |                 |                                                             |

**Fig. 3d-e**

| Pre-treatment | Perfusion | N number | Mean<br>±S.E.M | Statistics      | P-value<br>/Significance                                     |
|---------------|-----------|----------|----------------|-----------------|--------------------------------------------------------------|
| Sal(i.p.)     | ACSF      | 7        | 96.64 ± 3.632  | Unpaired t-test | Sal-ACSF vs Sal-Ket<br>$t_{(12)} = 4.034, P = 0.0017 / **$   |
|               | Ket       | 7        | 118.7 ± 4.103  |                 | Ket-ACSF vs Ket-Ket<br>$t_{(15)} = 3.802, P = 0.0017 / **$   |
| Ket (i.p.)    | ACSF      | 8        | 95.84 ± 1.877  |                 | Sal-Ket vs Ket-Ket<br>$t_{(14)} = 0.3591, P = 0.7249 / N.S.$ |
|               | Ket       | 9        | 121.6 ± 6.139  |                 |                                                              |

**Fig. 4a**

| Time  | Group | N number | Mean ±S.E.M   | Statistics    | Interaction                           | Time factor                           | Drug factor                           | P-value /Significance                 |
|-------|-------|----------|---------------|---------------|---------------------------------------|---------------------------------------|---------------------------------------|---------------------------------------|
| 8 hr  | Sal   | 9        | 149.4 ± 7.932 | Two-way ANOVA | $F_{(1, 30)} = 0.054$<br>$P = 0.8182$ | $F_{(1, 30)} = 1.003$<br>$P = 0.3245$ | $F_{(1, 30)} = 17.61$<br>$P = 0.0002$ | 8 hr: Sal vs SCA<br>$P = 0.0151 / *$  |
|       | SCA   | 9        | 112.4 ± 7.565 |               |                                       |                                       |                                       | 24 hr: Sal vs SCA<br>$P = 0.0494 / *$ |
| 24 hr | Sal   | 8        | 155.9 ± 8.501 |               |                                       |                                       |                                       |                                       |
|       | SCA   | 8        | 122.8 ± 9.486 |               |                                       |                                       |                                       |                                       |

**Fig. 4b**

| Experiment             | Group       | N number | Mean ±S.E.M     | Statistics      | P-value /Significance                      |
|------------------------|-------------|----------|-----------------|-----------------|--------------------------------------------|
| PCR (mRNA)             | 30 min: Sal | 6        | 1.0 ± 0.0675    | Unpaired t-test | $t_{(10)} = 0.8081$<br>$P = 0.4378 / N.S.$ |
|                        | 30 min: SCA | 6        | 0.9306 ± 0.0531 |                 |                                            |
|                        | 8 hrs: Sal  | 7        | 1.0 ± 0.0201    | Unpaired t-test | $t_{(12)} = 2.067$<br>$P = 0.0305 / *$     |
|                        | 8 hrs: SCA  | 7        | 1.683 ± 0.0262  |                 |                                            |
|                        | 24 hrs: Sal | 8        | 1.0 ± 0.0966    | Unpaired t-test | $t_{(14)} = 0.1246$<br>$P = 0.9026 / N.S.$ |
|                        | 24 hrs: SCA | 8        | 1.021 ± 0.1396  |                 |                                            |
| Western blot (protein) | 30 min: Sal | 6        | 1.0 ± 0.1068    | Unpaired t-test | $t_{(10)} = 0.6783$<br>$P = 0.5130 / N.S.$ |
|                        | 30 min: SCA | 6        | 0.9168 ± 0.0604 |                 |                                            |
|                        | 8 hrs: Sal  | 15       | 1.0 ± 0.1009    | Unpaired t-test | $t_{(28)} = 1.777$<br>$P = 0.0865 / N.S.$  |
|                        | 8 hrs: SCA  | 15       | 1.240 ± 0.0901  |                 |                                            |
|                        | 24 hrs: Sal | 8        | 1.0 ± 0.1070    | Unpaired t-test | $t_{(14)} = 0.6677$<br>$P = 0.5152 / N.S.$ |
|                        | 24 hrs: SCA | 8        | 0.8708 ± 0.1612 |                 |                                            |

**Fig. 4c**

| Time | Group | N number | Mean ±S.E.M     | Statistics         | P-value /Significance                      |
|------|-------|----------|-----------------|--------------------|--------------------------------------------|
| 8 h  | Sal   | 8        | 1.0 ± 0.1368    | Unpaired t-test    | $t_{(14)} = 0.7534$<br>$P = 0.4637 / N.S.$ |
|      | SCA   | 8        | 0.8718 ± 0.1011 |                    |                                            |
| 24 h | Sal   | 7        | 1.0 ± 0.1335    | Welch's correction | $t_{(2,313)} = 8.884$<br>$P = 0.0464 / *$  |
|      | SCA   | 8        | 1.883 ± 0.3577  |                    |                                            |

**Fig. 4d**

| Genotype        | Group | N number | Mean ±S.E.M    | Statistics    | Interaction                           | Genotype factor                        | Drug factor                           | P-value /Significance                  |
|-----------------|-------|----------|----------------|---------------|---------------------------------------|----------------------------------------|---------------------------------------|----------------------------------------|
| CTL             | Sal   | 10       | 1.0 ± 0.1143   | Two-way ANOVA | $F_{(1, 40)} = 5.760$<br>$P = 0.0211$ | $F_{(1, 40)} = 0.3670$<br>$P = 0.5481$ | $F_{(1, 40)} = 3.870$<br>$P = 0.0581$ | CTL: Sal vs SCA<br>$P = 0.0045 / **$   |
|                 | SCA   | 12       | 1.735 ± 0.1993 |               |                                       |                                        |                                       | cKO: Sal vs SCA<br>$P = 0.7470 / N.S.$ |
| <i>Bdnf</i> cKO | Sal   | 11       | 1.303 ± 0.1940 |               |                                       |                                        |                                       |                                        |
|                 | SCA   | 11       | 1.227 ± 0.1348 |               |                                       |                                        |                                       |                                        |

Fig. 4e

| Genotype        | Group | N number | Mean<br>±S.E.M | Statistics       | Interaction                           | Genotype factor                       | Drug factor                           | P-value<br>/Significance               |
|-----------------|-------|----------|----------------|------------------|---------------------------------------|---------------------------------------|---------------------------------------|----------------------------------------|
| CTL             | Sal   | 16       | 181.3 ± 9.904  | Two-way<br>ANOVA | $F_{(1, 54)} = 8.356$<br>$P = 0.0055$ | $F_{(1, 54)} = 17.85$<br>$P < 0.0001$ | $F_{(1, 54)} = 15.49$<br>$P = 0.0002$ | CTL: Sal vs SCA<br>$P < 0.0001$ / ***  |
|                 | SCA   | 14       | 196.9 ± 6.220  |                  |                                       |                                       |                                       | cKO: Sal vs SCA<br>$P = 0.8908$ / N.S. |
| <i>Bdnf</i> cKO | Sal   | 15       | 101.4 ± 17.65  |                  |                                       |                                       |                                       |                                        |
|                 | SCA   | 13       | 184.7 ± 8.262  |                  |                                       |                                       |                                       |                                        |

Fig. 4f

| Genotype        | Group | N number | Mean<br>±S.E.M | Statistics       | Interaction                           | Genotype factor                       | Drug factor                           | P-value<br>/Significance               |
|-----------------|-------|----------|----------------|------------------|---------------------------------------|---------------------------------------|---------------------------------------|----------------------------------------|
| CTL             | Sal   | 17       | 159.4 ± 10.53  | two-way<br>ANOVA | $F_{(1, 61)} = 4.183$<br>$P = 0.0451$ | $F_{(1, 61)} = 1.454$<br>$P = 0.2325$ | $F_{(1, 61)} = 3.206$<br>$P = 0.0783$ | CTL: Sal vs SCA<br>$P = 0.0315$ / *    |
|                 | SCA   | 18       | 118.6 ± 11.53  |                  |                                       |                                       |                                       | cKO: Sal vs SCA<br>$P = 0.9981$ / N.S. |
| <i>Bdnf</i> cKO | Sal   | 16       | 150.4 ± 11.17  |                  |                                       |                                       |                                       |                                        |
|                 | SCA   | 14       | 153.1 ± 7.438  |                  |                                       |                                       |                                       |                                        |

Fig. 4g

| Genotype        | Group | N number | Mean<br>±S.E.M | Statistics       | Interaction                           | Genotype factor                       | Drug factor                           | P-value<br>/Significance             |
|-----------------|-------|----------|----------------|------------------|---------------------------------------|---------------------------------------|---------------------------------------|--------------------------------------|
| CTL             | Sal   | 13       | 173.2 ± 7.548  | two-way<br>ANOVA | $F_{(1, 53)} = 1.295$<br>$P = 0.2602$ | $F_{(1, 53)} = 2.425$<br>$P = 0.1254$ | $F_{(1, 53)} = 39.04$<br>$P < 0.0001$ | CTL: Sal vs SCA<br>$P = 0.0048$ / ** |
|                 | SCA   | 16       | 118.7 ± 9.749  |                  |                                       |                                       |                                       | KI: Sal vs SCA<br>$P < 0.0001$ / *** |
| <i>MeCP2</i> KI | Sal   | 14       | 168.7 ± 8.802  |                  |                                       |                                       |                                       |                                      |
|                 | SCA   | 14       | 90 ± 14.91     |                  |                                       |                                       |                                       |                                      |

Fig. 4h

| Genotype        | Group | N number | Mean<br>±S.E.M | Statistics       | Interaction                          | Genotype factor                        | Drug factor                           | P-value<br>/Significance              |
|-----------------|-------|----------|----------------|------------------|--------------------------------------|----------------------------------------|---------------------------------------|---------------------------------------|
| CTL             | Sal   | 9        | 187.8 ± 5.174  | two-way<br>ANOVA | $F_{(1, 35)} = 6.09$<br>$P = 0.0186$ | $F_{(1, 35)} = 0.2507$<br>$P = 0.6197$ | $F_{(1, 35)} = 2.359$<br>$P = 0.1335$ | CTL: Sal vs SCA<br>$P = 0.0340$ / *   |
|                 | SCA   | 11       | 143.0 ± 8.348  |                  |                                      |                                        |                                       | KI: Sal vs SCA<br>$P = 0.9142$ / N.S. |
| <i>MeCP2</i> KI | Sal   | 9        | 165.8 ± 19.54  |                  |                                      |                                        |                                       |                                       |
|                 | SCA   | 10       | 176.2 ± 7.669  |                  |                                      |                                        |                                       |                                       |

**Fig. 5a**

| Time point | N number | Mean<br>±S.E.M | Statistics    | P-value<br>/Significance                     |
|------------|----------|----------------|---------------|----------------------------------------------|
| Base       | 8        | 100            | Paired t-test | $t_{(7)} = 0.5035, P = 0.6301 / \text{N.S.}$ |
| SCA        |          | 98.23 ± 3.516  |               |                                              |

**Fig. 5b**

| Time point       | N number | Mean<br>±S.E.M | Statistics    | P-value<br>/Significance                   |
|------------------|----------|----------------|---------------|--------------------------------------------|
| Base             | 7        | 100            | Paired t-test | $t_{(6)} = 11.81, P < 0.0001 / \text{***}$ |
| Washout<br>(LTD) |          | 72.50 ± 2.329  |               |                                            |

**Fig. 5c**

| Time point  | N number | Mean<br>±S.E.M | One-Way RM<br>ANOVA                    | Post-hoc test  | P-value<br>/Significance  |
|-------------|----------|----------------|----------------------------------------|----------------|---------------------------|
| Base        | 11       | 100            | $F_{(2, 20)} = 25.11,$<br>$P < 0.0001$ |                |                           |
| Wash1 (LTD) |          | 73.82 ± 3.412  |                                        | Base vs Wash1  | $P < 0.0001 / \text{***}$ |
| Wash2       |          | 86.87 ± 3.279  |                                        | Wash1 vs Wash2 | $P = 0.0057 / \text{**}$  |

**Fig.5d**

| Interstimulus<br>interval | Timepoint | N number | Mean<br>±S.E.M  | Statistics    | P-value<br>/Significance                     |
|---------------------------|-----------|----------|-----------------|---------------|----------------------------------------------|
| 20                        | Before    | 8        | 1.329 ± 0.08022 | Paired t-test | $t_{(7)} = 0.6319, P = 0.5475 / \text{N.S.}$ |
|                           | After     | 8        | 1.348 ± 0.07643 |               |                                              |
| 30                        | Before    | 8        | 1.421 ± 0.08378 | Paired t-test | $t_{(7)} = 0.7230, P = 0.4931 / \text{N.S.}$ |
|                           | After     | 8        | 1.401 ± 0.06265 |               |                                              |
| 50                        | Before    | 8        | 1.430 ± 0.07573 | Paired t-test | $t_{(7)} = 0.0124, P = 0.9904 / \text{N.S.}$ |
|                           | After     | 8        | 1.429 ± 0.05855 |               |                                              |
| 100                       | Before    | 8        | 1.413 ± 0.05774 | Paired t-test | $t_{(7)} = 0.4682, P = 0.6539 / \text{N.S.}$ |
|                           | After     | 8        | 1.435 ± 0.06459 |               |                                              |
| 200                       | Before    | 8        | 1.232 ± 0.03728 | Paired t-test | $t_{(7)} = 1.747, P = 0.2058 / \text{N.S.}$  |
|                           | After     | 8        | 1.212 ± 0.03748 |               |                                              |
| 400                       | Before    | 8        | 1.051 ± 0.02456 | Paired t-test | $t_{(7)} = 1.395, P = 0.1241 / \text{N.S.}$  |
|                           | After     | 8        | 1.101 ± 0.02040 |               |                                              |
| 500                       | Before    | 8        | 1.058 ± 0.02827 | Paired t-test | $t_{(7)} = 0.2232, P = 0.8297 / \text{N.S.}$ |
|                           | After     | 8        | 1.063 ± 0.02224 |               |                                              |

**Fig.5e**

| <b>Interstimulus interval</b> | <b>Timepoint</b> | <b>N number</b> | <b>Mean<br/>±S.E.M</b> | <b>Statistics</b> | <b>P-value<br/>/Significance</b>             |
|-------------------------------|------------------|-----------------|------------------------|-------------------|----------------------------------------------|
| 20                            | Before           | 7               | 1.376 ± 0.04804        | Paired t-test     | $t_{(6)} = 5.441, P = 0.0016 / **$           |
|                               | After            | 7               | 1.524 ± 0.05865        |                   |                                              |
| 30                            | Before           | 7               | 1.406 ± 0.02681        | Paired t-test     | $t_{(6)} = 3.131, P = 0.0203 / *$            |
|                               | After            | 7               | 1.541 ± 0.04391        |                   |                                              |
| 50                            | Before           | 7               | 1.413 ± 0.03502        | Paired t-test     | $t_{(6)} = 3.239, P = 0.0177 / *$            |
|                               | After            | 7               | 1.539 ± 0.03877        |                   |                                              |
| 100                           | Before           | 7               | 1.480 ± 0.05091        | Paired t-test     | $t_{(6)} = 2.510, P = 0.0459 / *$            |
|                               | After            | 7               | 1.602 ± 0.06754        |                   |                                              |
| 200                           | Before           | 7               | 1.276 ± 0.04418        | Paired t-test     | $t_{(6)} = 0.6406, P = 0.5454 / \text{N.S.}$ |
|                               | After            | 7               | 1.294 ± 0.05554        |                   |                                              |
| 400                           | Before           | 7               | 1.113 ± 0.03046        | Paired t-test     | $t_{(6)} = 0.0197, P = 0.9849 / \text{N.S.}$ |
|                               | After            | 7               | 1.112 ± 0.06050        |                   |                                              |
| 500                           | Before           | 7               | 1.070 ± 0.03428        | Paired t-test     | $t_{(6)} = 0.2255, P = 0.8291 / \text{N.S.}$ |
|                               | After            | 7               | 1.056 ± 0.03106        |                   |                                              |



**Fig.5f**

| <b>Interstimulus interval</b> | <b>Group</b> | <b>N number</b> | <b>Mean ±S.E.M</b> | <b>One-way RM ANOVA</b>                 | <b>Comparison</b> | <b>P-value /Significance</b> |
|-------------------------------|--------------|-----------------|--------------------|-----------------------------------------|-------------------|------------------------------|
| 20                            | Base         | 11              | 1.238 ± 0.04585    | $F_{(3, 30)} = 3.461,$<br>$P = 0.0285$  | Base vs Physo     | $P = 0.0172 / *$             |
|                               | Physo        | 11              | 1.387 ± 0.05012    |                                         | Physo vs SCA      | $P = 0.3637 / \text{N.S.}$   |
|                               | SCA          | 11              | 1.309 ± 0.06031    |                                         | Physo vs Wash2    | $P = 0.1915 / \text{N.S.}$   |
|                               | Wash2        | 11              | 1.290 ± 0.04420    |                                         | SCA vs Wash2      | $P = 0.9784 / \text{N.S.}$   |
| 30                            | Base         | 11              | 1.415 ± 0.04579    | $F_{(3, 30)} = 7.876,$<br>$P = 0.0005$  | Base vs Physo     | $P = 0.0024 / **$            |
|                               | Physo        | 11              | 1.670 ± 0.09548    |                                         | Physo vs SCA      | $P = 0.0007 / ***$           |
|                               | SCA          | 11              | 1.385 ± 0.03716    |                                         | Physo vs Wash2    | $P = 0.0216 / *$             |
|                               | Wash2        | 11              | 1.471 ± 0.06552    |                                         | SCA vs Wash2      | $P = 0.5525 / \text{N.S.}$   |
| 50                            | Base         | 11              | 1.454 ± 0.03419    | $F_{(3, 30)} = 8.660,$<br>$P = 0.0003$  | Base vs Physo     | $P = 0.0024 / **$            |
|                               | Physo        | 11              | 1.639 ± 0.05900    |                                         | Physo vs SCA      | $P = 0.0025 / **$            |
|                               | SCA          | 11              | 1.455 ± 0.05756    |                                         | Physo vs Wash2    | $P = 0.0005 / ***$           |
|                               | Wash2        | 11              | 1.427 ± 0.04083    |                                         | SCA vs Wash2      | $P = 0.934 / \text{N.S.}$    |
| 100                           | Base         | 11              | 1.441 ± 0.04462    | $F_{(3, 30)} = 3.315,$<br>$P = 0.0331$  | Base vs Physo     | $P = 0.0113 / *$             |
|                               | Physo        | 11              | 1.581 ± 0.04669    |                                         | Physo vs SCA      | $P = 0.0195 / *$             |
|                               | SCA          | 11              | 1.453 ± 0.05180    |                                         | Physo vs Wash2    | $P = 0.0166 / *$             |
|                               | Wash2        | 11              | 1.450 ± 0.04027    |                                         | SCA vs Wash2      | $P = 0.9454 / \text{N.S.}$   |
| 200                           | Base         | 11              | 1.259 ± 0.03321    | $F_{(3, 30)} = 2.126,$<br>$P = 0.1177$  | Base vs Physo     | $P = 0.3111 / \text{N.S.}$   |
|                               | Physo        | 11              | 1.334 ± 0.02888    |                                         | Physo vs SCA      | $P = 0.2798 / \text{N.S.}$   |
|                               | SCA          | 11              | 1.257 ± 0.03446    |                                         | Physo vs Wash2    | $P = 0.9999 / \text{N.S.}$   |
|                               | Wash2        | 11              | 1.333 ± 0.05002    |                                         | SCA vs Wash2      | $P = 0.2892 / \text{N.S.}$   |
| 400                           | Base         | 11              | 1.078 ± 0.01582    | $F_{(3, 30)} = 1.403,$<br>$P = 0.2610$  | Base vs Physo     | $P = 0.9968 / \text{N.S.}$   |
|                               | Physo        | 11              | 1.07 ± 0.03115     |                                         | Physo vs SCA      | $P = 0.3929 / \text{N.S.}$   |
|                               | SCA          | 11              | 1.132 ± 0.04141    |                                         | Physo vs Wash2    | $P = 0.9920 / \text{N.S.}$   |
|                               | Wash2        | 11              | 1.059 ± 0.02365    |                                         | SCA vs Wash2      | $P = 0.2564 / \text{N.S.}$   |
| 500                           | Base         | 11              | 1.059 ± 0.01987    | $F_{(3, 30)} = 0.5066,$<br>$P = 0.6807$ | Base vs Physo     | $P = 0.9998 / \text{N.S.}$   |
|                               | Physo        | 11              | 1.055 ± 0.03727    |                                         | Physo vs SCA      | $P = 0.6955 / \text{N.S.}$   |
|                               | SCA          | 11              | 1.114 ± 0.06278    |                                         | Physo vs Wash2    | $P = 0.9936 / \text{N.S.}$   |
|                               | Wash2        | 11              | 1.069 ± 0.02764    |                                         | SCA vs Wash2      | $P = 0.8381 / \text{N.S.}$   |

Fig.5g

| Interstimulus interval | Group      | N number | Mean ±S.E.M    | One-way ANOVA                           | Post-hoc test     | P-value /Significance |
|------------------------|------------|----------|----------------|-----------------------------------------|-------------------|-----------------------|
| 20                     | Sal        | 20       | 1.433 ± 0.0307 | $F_{(2, 61)} = 4.349,$<br>$P = 0.0171$  |                   |                       |
|                        | SCA (8 h)  | 24       | 1.299 ± 0.0441 |                                         | Sal vs SCA (8 h)  | $P = 0.0231 / *$      |
|                        | SCA (24 h) | 20       | 1.294 ± 0.0304 |                                         | Sal vs SCA (24 h) | $P = 0.0238 / *$      |
| 30                     | Sal        | 20       | 1.494 ± 0.0403 | $F_{(2, 61)} = 3.561,$<br>$P = 0.0345$  |                   |                       |
|                        | SCA (8 h)  | 24       | 1.394 ± 0.0274 |                                         | Sal vs SCA (8 h)  | $P = 0.0465 / *$      |
|                        | SCA (24 h) | 20       | 1.386 ± 0.0251 |                                         | Sal vs SCA (24 h) | $P = 0.0394 / *$      |
| 50                     | Sal        | 20       | 1.546 ± 0.0273 | $F_{(2, 61)} = 5.169,$<br>$P = 0.0084$  |                   |                       |
|                        | SCA (8 h)  | 24       | 1.413 ± 0.0342 |                                         | Sal vs SCA (8 h)  | $P = 0.0054 / **$     |
|                        | SCA (24 h) | 20       | 1.443 ± 0.0271 |                                         | Sal vs SCA (24 h) | $P = 0.0455 / *$      |
| 100                    | Sal        | 20       | 1.426 ± 0.0236 | $F_{(2, 61)} = 0.7896,$<br>$P = 0.4586$ |                   |                       |
|                        | SCA (8 h)  | 24       | 1.391 ± 0.0281 |                                         | Sal vs SCA (8 h)  | $P = 0.5605 / N.S.$   |
|                        | SCA (24 h) | 20       | 1.377 ± 0.0306 |                                         | Sal vs SCA (24 h) | $P = 0.3742 / N.S.$   |
| 200                    | Sal        | 20       | 1.230 ± 0.0226 | $F_{(2, 61)} = 0.5068,$<br>$P = 0.6049$ |                   |                       |
|                        | SCA (8 h)  | 24       | 1.197 ± 0.0261 |                                         | Sal vs SCA (8 h)  | $P = 0.5816 / N.S.$   |
|                        | SCA (24 h) | 20       | 1.196 ± 0.0306 |                                         | Sal vs SCA (24 h) | $P = 0.5851 / N.S.$   |
| 400                    | Sal        | 20       | 1.086 ± 0.0219 | $F_{(2, 61)} = 5.716,$<br>$P = 0.0053$  |                   |                       |
|                        | SCA (8 h)  | 24       | 1.018 ± 0.0099 |                                         | Sal vs SCA (8 h)  | $P = 0.0186 / *$      |
|                        | SCA (24 h) | 20       | 1.097 ± 0.0234 |                                         | Sal vs SCA (24 h) | $P = 0.8968 / N.S.$   |
| 500                    | Sal        | 20       | 1.067 ± 0.0237 | $F_{(2, 61)} = 0.9880,$<br>$P = 0.3782$ |                   |                       |
|                        | SCA (8 h)  | 24       | 1.029 ± 0.0163 |                                         | Sal vs SCA (8 h)  | $P = 0.2767 / N.S.$   |
|                        | SCA (24 h) | 20       | 1.046 ± 0.0179 |                                         | Sal vs SCA (24 h) | $P = 0.6880 / N.S.$   |

**Fig. 5h**

| Genotype | Interstimulus interval | Group      | N number | Mean ±S.E.M     | Statistics              | P-value /Significance                  |                     |                     |
|----------|------------------------|------------|----------|-----------------|-------------------------|----------------------------------------|---------------------|---------------------|
| CTL      | 20                     | Sal        | 20       | 1.342 ± 0.0274  | Unpaired t-test         | $t_{(38)} = 3.666, P = 0.0008 / ***$   |                     |                     |
|          |                        | SCA (24 h) | 20       | 1.204 ± 0.0261  |                         |                                        |                     |                     |
|          | 30                     | Sal        | 20       | 1.414 ± 0.0374  | Unpaired t-test         | $t_{(38)} = 2.756, P = 0.0089 / **$    |                     |                     |
|          |                        | SCA (24 h) | 20       | 1.293 ± 0.0230  |                         |                                        |                     |                     |
|          | 50                     | Sal        | 20       | 1.474 ± 0.0273  | Unpaired t-test         | $t_{(38)} = 3.745, P = 0.0006 / ***$   |                     |                     |
|          |                        | SCA (24 h) | 20       | 1.351 ± 0.0186  |                         |                                        |                     |                     |
|          | 100                    | Sal        | 20       | 1.406 ± 0.0282  | Unpaired t-test         | $t_{(38)} = 2.225, P = 0.0321 / *$     |                     |                     |
|          |                        | SCA (24 h) | 20       | 1.327 ± 0.0212  |                         |                                        |                     |                     |
|          | 200                    | Sal        | 20       | 1.197 ± 0.0208  | Mann-Whitney test       | $U = 157, P = 0.2534 / N.S.$           |                     |                     |
|          |                        | SCA (24 h) | 20       | 1.171 ± 0.0126  |                         |                                        |                     |                     |
|          | 400                    | Sal        | 20       | 1.070 ± 0.0181  | Unpaired t-test         | $t_{(38)} = 0.1855, P = 0.8538 / N.S.$ |                     |                     |
|          |                        | SCA (24 h) | 20       | 1.067 ± 0.0103  |                         |                                        |                     |                     |
|          | 500                    | Sal        | 20       | 1.071 ± 0.0169  | Unpaired t-test         | $t_{(38)} = 2.0333, P = 0.0491 / *$    |                     |                     |
|          |                        | SCA (24 h) | 20       | 1.023 ± 0.0163  |                         |                                        |                     |                     |
| Mecp2 KI | 20                     | Sal        | 17       | 1.357 ± 0.0354  | One-way ANOVA           |                                        |                     |                     |
|          |                        | SCA (8 h)  | 15       | 1.242 ± 0.218   |                         |                                        |                     |                     |
|          |                        | SCA (24 h) | 14       | 1.453 ± 0.0446  |                         |                                        |                     |                     |
|          | 30                     | Sal        | 17       | 1.427 ± 0.0439  | One-way ANOVA           |                                        |                     |                     |
|          |                        | SCA (8 h)  | 15       | 1.328 ± 0.0125  |                         |                                        |                     |                     |
|          |                        | SCA (24 h) | 14       | 1.495 ± 0.05918 |                         |                                        |                     |                     |
|          | 50                     | Sal        | 17       | 1.517 ± 0.0393  | One-way ANOVA           |                                        |                     |                     |
|          |                        | SCA (8 h)  | 15       | 1.376 ± 0.0230  |                         |                                        |                     |                     |
|          |                        | SCA (24 h) | 14       | 1.527 ± 0.0531  |                         |                                        |                     |                     |
|          | 100                    | Sal        | 17       | 1.382 ± 0.0432  | One-way ANOVA           |                                        |                     |                     |
|          |                        | SCA (8 h)  | 15       | 1.362 ± 0.0235  |                         |                                        |                     |                     |
|          |                        | SCA (24 h) | 14       | 1.474 ± 0.0415  |                         |                                        |                     |                     |
|          | 200                    | Sal        | 17       | 1.216 ± 0.0281  | One-way ANOVA           |                                        |                     |                     |
|          |                        | SCA (8 h)  | 15       | 1.195 ± 0.0200  |                         |                                        |                     |                     |
|          |                        | SCA (24 h) | 14       | 1.222 ± 0.0244  |                         |                                        |                     |                     |
|          | 400                    | Sal        | 17       | 1.098 ± 0.0225  | One-way ANOVA           |                                        |                     |                     |
|          |                        | SCA (8 h)  | 15       | 1.098 ± 0.0175  |                         |                                        |                     |                     |
|          |                        | SCA (24 h) | 14       | 1.077 ± 0.0157  |                         |                                        |                     |                     |
|          | 500                    | Sal        | 17       | 1.092 ± 0.0227  | One-way ANOVA           |                                        |                     |                     |
|          |                        | SCA (8 h)  | 15       | 1.040 ± 0.0178  |                         |                                        |                     |                     |
|          |                        | SCA (24 h) | 14       | 1.090 ± 0.0247  |                         |                                        |                     |                     |
|          |                        |            |          |                 |                         | $F_{(2, 43)} = 8.761,$                 | Sal vs SCA (8 h)    | $P = 0.0392 / *$    |
|          |                        |            |          |                 |                         | $P = 0.0006$                           | Sal vs SCA (24 h)   | $P = 0.1059 / N.S.$ |
|          |                        |            |          |                 |                         | $F_{(2, 43)} = 3.689,$                 | Sal vs SCA (8 h)    | $P = 0.0427 / *$    |
|          |                        |            |          |                 | $P = 0.0332$            | Sal vs SCA (24 h)                      | $P = 0.3593 / N.S.$ |                     |
|          |                        |            |          |                 | $F_{(2, 43)} = 4.407,$  | Sal vs SCA (8 h)                       | $P = 0.0271 / *$    |                     |
|          |                        |            |          |                 | $P = 0.0182$            | Sal vs SCA (24 h)                      | $P = 0.8823 / N.S.$ |                     |
|          |                        |            |          |                 | $F_{(2, 43)} = 8.761,$  | Sal vs SCA (8 h)                       | $P = 0.9004 / N.S.$ |                     |
|          |                        |            |          |                 | $P = 0.0006$            | Sal vs SCA (24 h)                      | $P = 0.1639 / N.S.$ |                     |
|          |                        |            |          |                 | $F_{(2, 43)} = 0.3085,$ | Sal vs SCA (8 h)                       | $P = 0.7805 / N.S.$ |                     |
|          |                        |            |          |                 | $P = 0.7361$            | Sal vs SCA (24 h)                      | $P = 0.9772 / N.S.$ |                     |
|          |                        |            |          |                 | $F_{(2, 43)} = 0.3679,$ | Sal vs SCA (8 h)                       | $P = 0.9997 / N.S.$ |                     |
|          |                        |            |          |                 | $P = 0.6943$            | Sal vs SCA (24 h)                      | $P = 0.6776 / N.S.$ |                     |
|          |                        |            |          |                 | $F_{(2, 43)} = 1.777,$  | Sal vs SCA (8 h)                       | $P = 0.1704 / N.S.$ |                     |
|          |                        |            |          |                 | $P = 0.1814$            | Sal vs SCA (24 h)                      | $P = 0.9974 / N.S.$ |                     |

**Fig. 5i**

| Genotype        | Interstimulus interval | Group      | N number | Mean ±S.E.M    | Statistics                              | P-value /Significance                         |  |                   |                            |
|-----------------|------------------------|------------|----------|----------------|-----------------------------------------|-----------------------------------------------|--|-------------------|----------------------------|
| CTL             | 20                     | Sal        | 31       | 1.399 ± 0.0397 | Unpaired t-test                         | $t_{(56)} = 2.675, P = 0.0098 / **$           |  |                   |                            |
|                 |                        | SCA (24 h) | 27       | 1.251 ± 0.0381 |                                         |                                               |  |                   |                            |
|                 | 30                     | Sal        | 31       | 1.476 ± 0.326  | Unpaired t-test                         | $t_{(56)} = 2.364, P = 0.0216 / *$            |  |                   |                            |
|                 |                        | SCA (24 h) | 27       | 1.366 ± 0.0336 |                                         |                                               |  |                   |                            |
|                 | 50                     | Sal        | 31       | 1.521 ± 0.341  | Welch's correction                      | $t_{(49.78)} = 2.706, P = 0.0093 / **$        |  |                   |                            |
|                 |                        | SCA (24 h) | 27       | 1.411 ± 0.0217 |                                         |                                               |  |                   |                            |
|                 | 100                    | Sal        | 31       | 1.421 ± 0.0242 | Unpaired t-test                         | $t_{(56)} = 0.7216, P = 0.4753 / \text{N.S.}$ |  |                   |                            |
|                 |                        | SCA (24 h) | 27       | 1.395 ± 0.0271 |                                         |                                               |  |                   |                            |
|                 | 200                    | Sal        | 31       | 1.267 ± 0.0203 | Unpaired t-test                         | $t_{(56)} = 2.491, P = 0.0157 / *$            |  |                   |                            |
|                 |                        | SCA (24 h) | 27       | 1.184 ± 0.0273 |                                         |                                               |  |                   |                            |
|                 | 400                    | Sal        | 31       | 1.119 ± 0.0217 | Mann-Whitney test                       | $U = 216, P = 0.0013 / **$                    |  |                   |                            |
|                 |                        | SCA (24 h) | 27       | 1.031 ± 0.0152 |                                         |                                               |  |                   |                            |
|                 | 500                    | Sal        | 31       | 1.078 ± 0.0192 | Unpaired t-test                         | $t_{(56)} = 2.065, P = 0.0436 / *$            |  |                   |                            |
|                 |                        | SCA (24 h) | 27       | 1.015 ± 0.0239 |                                         |                                               |  |                   |                            |
| <i>Bdnf</i> cKO | 20                     | Sal        | 21       | 1.375 ± 0.0487 | One-way ANOVA                           |                                               |  |                   |                            |
|                 |                        | SCA (8 h)  | 11       | 1.370 ± 0.0448 | $F_{(2, 55)} = 0.0165,$<br>$P = 0.9837$ |                                               |  | Sal vs SCA (8 h)  | $P = 0.9960 / \text{N.S.}$ |
|                 |                        | SCA (24 h) | 26       | 1.381 ± 0.0325 |                                         |                                               |  | Sal vs SCA (24 h) | $P = 0.9906 / \text{N.S.}$ |
|                 | 30                     | Sal        | 21       | 1.485 ± 0.0335 | One-way ANOVA                           |                                               |  |                   |                            |
|                 |                        | SCA (8 h)  | 11       | 1.463 ± 0.0469 | $F_{(2, 55)} = 0.0642,$<br>$P = 0.9379$ |                                               |  | Sal vs SCA (8 h)  | $P = 0.9208 / \text{N.S.}$ |
|                 |                        | SCA (24 h) | 26       | 1.472 ± 0.0383 |                                         |                                               |  | Sal vs SCA (24 h) | $P = 0.9549 / \text{N.S.}$ |
|                 | 50                     | Sal        | 21       | 1.488 ± 0.0382 | One-way ANOVA                           |                                               |  |                   |                            |
|                 |                        | SCA (8 h)  | 11       | 1.498 ± 0.0451 | $F_{(2, 55)} = 0.1163,$<br>$P = 0.8905$ |                                               |  | Sal vs SCA (8 h)  | $P = 0.9803 / \text{N.S.}$ |
|                 |                        | SCA (24 h) | 26       | 1.473 ± 0.0259 |                                         |                                               |  | Sal vs SCA (24 h) | $P = 0.9248 / \text{N.S.}$ |
|                 | 100                    | Sal        | 21       | 1.382 ± 0.0390 | One-way ANOVA                           |                                               |  |                   |                            |
|                 |                        | SCA (8 h)  | 11       | 1.4 ± 0.0312   | $F_{(2, 55)} = 0.2140,$<br>$P = 0.8080$ |                                               |  | Sal vs SCA (8 h)  | $P = 0.9405 / \text{N.S.}$ |
|                 |                        | SCA (24 h) | 26       | 1.413 ± 0.0307 |                                         |                                               |  | Sal vs SCA (24 h) | $P = 0.7453 / \text{N.S.}$ |
|                 | 200                    | Sal        | 21       | 1.185 ± 0.0284 | One-way ANOVA                           |                                               |  |                   |                            |
|                 |                        | SCA (8 h)  | 11       | 1.214 ± 0.0250 | $F_{(2, 55)} = 0.7722,$<br>$P = 0.4670$ |                                               |  | Sal vs SCA (8 h)  | $P = 0.7317 / \text{N.S.}$ |
|                 |                        | SCA (24 h) | 26       | 1.227 ± 0.0221 |                                         |                                               |  | Sal vs SCA (24 h) | $P = 0.3732 / \text{N.S.}$ |
|                 | 400                    | Sal        | 21       | 1.069 ± 0.0215 | One-way ANOVA                           |                                               |  |                   |                            |
|                 |                        | SCA (8 h)  | 11       | 1.079 ± 0.0270 | $F_{(2, 55)} = 0.0407,$<br>$P = 0.9602$ |                                               |  | Sal vs SCA (8 h)  | $P = 0.9455 / \text{N.S.}$ |
|                 |                        | SCA (24 h) | 26       | 1.071 ± 0.0182 |                                         |                                               |  | Sal vs SCA (24 h) | $P = 0.9949 / \text{N.S.}$ |
|                 | 500                    | Sal        | 21       | 1.047 ± 0.0286 | One-way ANOVA                           |                                               |  |                   |                            |
|                 |                        | SCA (8 h)  | 11       | 1.049 ± 0.0242 | $F_{(2, 55)} = 0.0165,$<br>$P = 0.9837$ |                                               |  | Sal vs SCA (8 h)  | $P = 0.9977 / \text{N.S.}$ |
|                 |                        | SCA (24 h) | 26       | 1.061 ± 0.0175 |                                         |                                               |  | Sal vs SCA (24 h) | $P = 0.8566 / \text{N.S.}$ |

**Fig. 6a**

| Protein      | Group | N number | Mean<br>±S.E.M | Statistics      | P-value<br>/Significance                      |
|--------------|-------|----------|----------------|-----------------|-----------------------------------------------|
| pMeCP2/MeCP2 | Sal   | 7        | 1.0 ± 0.2257   | Unpaired t-test | $t_{(12)} = 2.465, P = 0.0298 / *$            |
|              | PRZP  | 7        | 1.647 ± 0.1338 |                 |                                               |
| pCREB/CREB   | Sal   | 8        | 1.0 ± 0.0278   | Unpaired t-test | $t_{(13)} = 0.9481, P = 0.3604 / \text{N.S.}$ |
|              | PRZP  | 7        | 1.039 ± 0.0311 |                 |                                               |

**Fig. 6b**

| Interstimulus interval | Group | N number | Mean<br>±S.E.M | Statistics        | P-value<br>/Significance                      |
|------------------------|-------|----------|----------------|-------------------|-----------------------------------------------|
| 20                     | Sal   | 20       | 1.367 ± 0.0384 | Unpaired t-test   | $t_{(46)} = 2.545, P = 0.0143 / *$            |
|                        | PRZP  | 28       | 1.226 ± 0.0380 |                   |                                               |
| 30                     | Sal   | 20       | 1.422 ± 0.0334 | Unpaired t-test   | $t_{(46)} = 3.509, P = 0.0010 / **$           |
|                        | PRZP  | 28       | 1.27 ± 0.0278  |                   |                                               |
| 50                     | Sal   | 20       | 1.453 ± 0.0271 | Unpaired t-test   | $t_{(46)} = 2.201, P = 0.0328 / *$            |
|                        | PRZP  | 28       | 1.363 ± 0.0287 |                   |                                               |
| 100                    | Sal   | 20       | 1.414 ± 0.0277 | Unpaired t-test   | $t_{(46)} = 2.196, P = 0.0331 / *$            |
|                        | PRZP  | 28       | 1.334 ± 0.0236 |                   |                                               |
| 200                    | Sal   | 20       | 1.206 ± 0.0261 | Mann-Whitney test | $U = 263, P = 0.7325 / \text{N.S.}$           |
|                        | PRZP  | 28       | 1.207 ± 0.0174 |                   |                                               |
| 400                    | Sal   | 20       | 1.101 ± 0.0242 | Unpaired t-test   | $t_{(46)} = 0.9611, P = 0.3415 / \text{N.S.}$ |
|                        | PRZP  | 28       | 1.075 ± 0.0156 |                   |                                               |
| 500                    | Sal   | 20       | 1.11 ± 0.0229  | Mann-Whitney test | $U = 198, P = 0.0884 / \text{N.S.}$           |
|                        | PRZP  | 28       | 1.068 ± 0.0156 |                   |                                               |

Fig. 6c

| Interstimulus interval | Group    | N number | Mean $\pm$ S.E.M   | Statistics    | Interaction                            | Drug factor                            | Genotype factor                        | P-value /Significance                      |
|------------------------|----------|----------|--------------------|---------------|----------------------------------------|----------------------------------------|----------------------------------------|--------------------------------------------|
| 20                     | CTL-Sal  | 18       | 1.421 $\pm$ 0.0450 | Two-way ANOVA | $F_{(1, 67)} = 8.467$<br>$P = 0.0049$  | $F_{(1, 67)} = 2.982$<br>$P = 0.0888$  | $F_{(1, 67)} = 2.461$<br>$P = 0.1214$  | CTL-Sal vs CTL-PRZP<br>$P = 0.0082$ / **   |
|                        | CTL-PRZP | 18       | 1.217 $\pm$ 0.0326 |               |                                        |                                        |                                        | KI-Sal vs KI-PRZP<br>$P = 0.8398$ / N.S.   |
|                        | KI-Sal   | 16       | 1.38 $\pm$ 0.0518  |               |                                        |                                        |                                        |                                            |
|                        | KI-PRZP  | 18       | 1.414 $\pm$ 0.0457 |               |                                        |                                        |                                        |                                            |
| 30                     | CTL-Sal  | 18       | 1.482 $\pm$ 0.0400 | Two-way ANOVA | $F_{(1, 67)} = 7.78$<br>$P = 0.0069$   | $F_{(1, 67)} = 1.455$<br>$P = 0.2320$  | $F_{(1, 67)} = 3.143$<br>$P = 0.0808$  | CTL-Sal vs CTL-PRZP<br>$P = 0.0293$ / *    |
|                        | CTL-PRZP | 18       | 1.33 $\pm$ 0.0265  |               |                                        |                                        |                                        | KI-Sal vs KI-PRZP<br>$P = 0.6838$ / N.S.   |
|                        | KI-Sal   | 16       | 1.456 $\pm$ 0.0457 |               |                                        |                                        |                                        |                                            |
|                        | KI-PRZP  | 18       | 1.504 $\pm$ 0.0393 |               |                                        |                                        |                                        |                                            |
| 50                     | CTL-Sal  | 18       | 1.514 $\pm$ 0.0303 | Two-way ANOVA | $F_{(1, 67)} = 7.389$<br>$P = 0.0083$  | $F_{(1, 67)} = 3.446$<br>$P = 0.0678$  | $F_{(1, 67)} = 6.9$<br>$P = 0.0107$    | CTL-Sal vs CTL-PRZP<br>$P = 0.0093$ / **   |
|                        | CTL-PRZP | 18       | 1.363 $\pm$ 0.0218 |               |                                        |                                        |                                        | KI-Sal vs KI-PRZP<br>$P = 0.9301$ / N.S.   |
|                        | KI-Sal   | 16       | 1.509 $\pm$ 0.0340 |               |                                        |                                        |                                        |                                            |
|                        | KI-PRZP  | 18       | 1.54 $\pm$ 0.0442  |               |                                        |                                        |                                        |                                            |
| 100                    | CTL-Sal  | 18       | 1.435 $\pm$ 0.0340 | Two-way ANOVA | $F_{(1, 67)} = 3.845$<br>$p = 0.0540$  | $F_{(1, 67)} = 0.0972$<br>$p = 0.7562$ | $F_{(1, 67)} = 3.302$<br>$p = 0.0737$  | CTL-Sal vs CTL-PRZP<br>$P = 0.0961$ / N.S. |
|                        | CTL-PRZP | 18       | 1.359 $\pm$ 0.0281 |               |                                        |                                        |                                        | KI-Sal vs KI-PRZP<br>$P = 0.2578$ / N.S.   |
|                        | KI-Sal   | 16       | 1.428 $\pm$ 0.0407 |               |                                        |                                        |                                        |                                            |
|                        | KI-PRZP  | 18       | 1.485 $\pm$ 0.0322 |               |                                        |                                        |                                        |                                            |
| 200                    | CTL-Sal  | 18       | 1.196 $\pm$ 0.0260 | Two-way ANOVA | $F_{(1, 67)} = 1.415$<br>$P = 0.2384$  | $F_{(1, 67)} = 0.0516$<br>$P = 0.8210$ | $F_{(1, 67)} = 2.184$<br>$P = 0.1441$  | CTL-Sal vs CTL-PRZP<br>$P = 0.9022$ / N.S. |
|                        | CTL-PRZP | 18       | 1.226 $\pm$ 0.0232 |               |                                        |                                        |                                        | KI-Sal vs KI-PRZP<br>$P = 0.7529$ / N.S.   |
|                        | KI-Sal   | 16       | 1.268 $\pm$ 0.0452 |               |                                        |                                        |                                        |                                            |
|                        | KI-PRZP  | 18       | 1.235 $\pm$ 0.0290 |               |                                        |                                        |                                        |                                            |
| 400                    | CTL-Sal  | 18       | 1.077 $\pm$ 0.0269 | Two-way ANOVA | $F_{(1, 67)} = 0.6877$<br>$P = 0.4099$ | $F_{(1, 67)} = 1.272$<br>$P = 0.2635$  | $F_{(1, 67)} = 0.0433$<br>$P = 0.8358$ | CTL-Sal vs CTL-PRZP<br>$P = 0.9966$ / N.S. |
|                        | CTL-PRZP | 18       | 1.07 $\pm$ 0.0143  |               |                                        |                                        |                                        | KI-Sal vs KI-PRZP<br>$P = 0.5200$ / N.S.   |
|                        | KI-Sal   | 16       | 1.079 $\pm$ 0.0188 |               |                                        |                                        |                                        |                                            |
|                        | KI-PRZP  | 18       | 1.055 $\pm$ 0.0233 |               |                                        |                                        |                                        |                                            |
| 500                    | CTL-Sal  | 18       | 1.045 $\pm$ 0.0211 | Two-way ANOVA | $F_{(1, 67)} = 0.1621$<br>$P = 0.6885$ | $F_{(1, 67)} = 0.0194$<br>$P = 0.8896$ | $F_{(1, 67)} = 5.915$<br>$P = 0.0177$  | CTL-Sal vs CTL-PRZP<br>$P = 0.9976$ / N.S. |
|                        | CTL-PRZP | 18       | 1.051 $\pm$ 0.0157 |               |                                        |                                        |                                        | KI-Sal vs KI-PRZP<br>$P = 0.9811$ / N.S.   |
|                        | KI-Sal   | 16       | 1.092 $\pm$ 0.0228 |               |                                        |                                        |                                        |                                            |
|                        | KI-PRZP  | 18       | 1.101 $\pm$ 0.0277 |               |                                        |                                        |                                        |                                            |

**Fig. 7a**

| Group    | N number | Mean ±S.E.M   | One-way ANOVA                         | P-value /Significance |                     |
|----------|----------|---------------|---------------------------------------|-----------------------|---------------------|
| No Cort  | 8        | 121.3 ± 7.690 | $F_{(2, 23)} = 6.616$<br>$P = 0.0054$ | No Cort vs Cort-Sal   | $P = 0.0050$ / **   |
| Cort-Sal | 9        | 152.0 ± 5.475 |                                       | No Cort vs Cort-Ket   | $P = 0.5290$ / N.S. |
| Cort-Ket | 9        | 130.8 ± 5.214 |                                       | Cort-Sal vs Cort-Ket  | $P = 0.499$ / *     |

**Fig. 7b**

| Genotype | Group | N number | Mean ±S.E.M   | Statistics       | Interaction                            | Time factor                           | Drug factor                           | P-value /Significance                |  |  |  |
|----------|-------|----------|---------------|------------------|----------------------------------------|---------------------------------------|---------------------------------------|--------------------------------------|--|--|--|
| 24 h     | Sal   | 9        | 149.3 ± 6.972 | Two-way RM ANOVA | $F_{(1, 17)} = 0.0670$<br>$P = 0.7989$ | $F_{(1, 17)} = 2.386$<br>$P = 0.1408$ | $F_{(1, 17)} = 19.18$<br>$P = 0.0004$ | 24h: Sal vs SCA<br>$P = 0.0065$ / ** |  |  |  |
|          | SCA   | 10       | 126.2 ± 3.402 |                  |                                        |                                       |                                       | 24h: Sal vs SCA<br>$P = 0.0026$ / ** |  |  |  |
| 7 days   | Sal   | 9        | 157.9 ± 5.298 |                  |                                        |                                       |                                       |                                      |  |  |  |
|          | SCA   | 10       | 132.3 ± 4.768 |                  |                                        |                                       |                                       |                                      |  |  |  |

**Extended Data Fig. 1**

| Group | N number | Mean ±S.E.M    | Statistics      | P-value /Significance                      |
|-------|----------|----------------|-----------------|--------------------------------------------|
| Sal   | 8        | 1.0 ± 0.1457   | Unpaired t-test | $t_{(14)} = 0.3298$<br>$P = 0.7464$ / N.S. |
| Ket   | 8        | 1.068 ± 0.1463 |                 |                                            |

**Extended Data Fig. 2**

| Genotype        | Group | N number | Mean ±S.E.M    | Statistics    | Interaction                            | Genotype factor                        | Drug factor                           | P-value /Significance                   |  |  |  |
|-----------------|-------|----------|----------------|---------------|----------------------------------------|----------------------------------------|---------------------------------------|-----------------------------------------|--|--|--|
| CTL             | Sal   | 7        | 1.0 ± 0.1596   | Two-way ANOVA | $F_{(1, 21)} = 0.0157$<br>$P = 0.9016$ | $F_{(1, 21)} = 0.0115$<br>$P = 0.9158$ | $F_{(1, 21)} = 31.93$<br>$P < 0.0001$ | CTL-Sal vs CTL-Ket<br>$P = 0.0014$ / ** |  |  |  |
|                 | Ket   | 7        | 1.964 ± 0.1162 |               |                                        |                                        |                                       | KI-Sal vs KI-Ket<br>$P = 0.0069$ / **   |  |  |  |
| <i>Mecp2</i> KI | Sal   | 6        | 1.039 ± 0.1823 |               |                                        |                                        |                                       |                                         |  |  |  |
|                 | Ket   | 5        | 1.961 ± 0.2186 |               |                                        |                                        |                                       |                                         |  |  |  |

**Extended Data Fig. 3a**

| Group    | N number | Mean ±S.E.M    | Statistics      | P-value /Significance                 |
|----------|----------|----------------|-----------------|---------------------------------------|
| Sal-Base | 9        | 4.128 ± 0.5270 | Unpaired t-test | $t_{(17)} = 1.448, P = 0.1659$ / N.S. |
| Ket-Base | 10       | 5.494 ± 0.7581 |                 |                                       |

Extended Data Fig. 3b

| Interstimulus interval | Group   |        | N number | Mean $\pm$ S.E.M   | Statistics    | Interaction                            | Pretreatment factor                    | Ketamine factor                        |
|------------------------|---------|--------|----------|--------------------|---------------|----------------------------------------|----------------------------------------|----------------------------------------|
| 20                     | Sal-Ket | before | 11       | 1.385 $\pm$ 0.0336 | Two-way ANOVA | $F_{(1, 38)} = 0.1944$<br>$P = 0.6618$ | $F_{(1, 38)} = 0.4597$<br>$P = 0.5019$ | $F_{(1, 38)} = 1.174$<br>$P = 0.2854$  |
|                        |         | after  | 11       | 1.359 $\pm$ 0.0445 |               |                                        |                                        |                                        |
|                        | Ket-Ket | before | 10       | 1.376 $\pm$ 0.0460 |               |                                        |                                        |                                        |
|                        |         | after  | 10       | 1.315 $\pm$ 0.0316 |               |                                        |                                        |                                        |
| 30                     | Sal-Ket | before | 11       | 1.476 $\pm$ 0.0318 | Two-way ANOVA | $F_{(1, 38)} = 0.0682$<br>$P = 0.7954$ | $F_{(1, 38)} = 1.111$<br>$P = 0.2985$  | $F_{(1, 38)} = 0.6195$<br>$P = 0.4361$ |
|                        |         | after  | 11       | 1.455 $\pm$ 0.0471 |               |                                        |                                        |                                        |
|                        | Ket-Ket | before | 10       | 1.444 $\pm$ 0.0473 |               |                                        |                                        |                                        |
|                        |         | after  | 10       | 1.402 $\pm$ 0.0335 |               |                                        |                                        |                                        |
| 50                     | Sal-Ket | before | 11       | 1.555 $\pm$ 0.0291 | Two-way ANOVA | $F_{(1, 38)} = 0.1586$<br>$P = 0.6927$ | $F(1, 38) = 0.8878$<br>$P = 0.3520$    | $F_{(1, 38)} = 0.0068$<br>$P = 0.9345$ |
|                        |         | after  | 11       | 1.542 $\pm$ 0.0442 |               |                                        |                                        |                                        |
|                        | Ket-Ket | before | 10       | 1.499 $\pm$ 0.0361 |               |                                        |                                        |                                        |
|                        |         | after  | 10       | 1.519 $\pm$ 0.0547 |               |                                        |                                        |                                        |
| 100                    | Sal-Ket | before | 11       | 1.457 $\pm$ 0.0359 | Two-way ANOVA | $F_{(1, 38)} = 0.0307$<br>$P = 0.8619$ | $F_{(1, 38)} = 0.0732$<br>$P = 0.7882$ | $F_{(1, 38)} = 0.2228$<br>$P = 0.6396$ |
|                        |         | after  | 11       | 1.480 $\pm$ 0.0442 |               |                                        |                                        |                                        |
|                        | Ket-Ket | before | 10       | 1.454 $\pm$ 0.0244 |               |                                        |                                        |                                        |
|                        |         | after  | 10       | 1.464 $\pm$ 0.0323 |               |                                        |                                        |                                        |
| 200                    | Sal-Ket | before | 11       | 1.259 $\pm$ 0.0273 | Two-way ANOVA | $F_{(1, 38)} = 0.7025$<br>$P = 0.4072$ | $F_{(1, 38)} = 0.8733$<br>$P = 0.3560$ | $F_{(1, 38)} = 0.4935$<br>$P = 0.4866$ |
|                        |         | after  | 11       | 1.311 $\pm$ 0.0265 |               |                                        |                                        |                                        |
|                        | Ket-Ket | before | 10       | 1.256 $\pm$ 0.1524 |               |                                        |                                        |                                        |
|                        |         | after  | 10       | 1.252 $\pm$ 0.0300 |               |                                        |                                        |                                        |
| 400                    | Sal-Ket | before | 11       | 1.091 $\pm$ 0.0177 | Two-way ANOVA | $F_{(1, 38)} = 0.1475$<br>$P = 0.7030$ | $F_{(1, 38)} = 0.0614$<br>$P = 0.8056$ | $F_{(1, 38)} = 0.4658$<br>$P = 0.4991$ |
|                        |         | after  | 11       | 1.097 $\pm$ 0.0552 |               |                                        |                                        |                                        |
|                        | Ket-Ket | before | 10       | 1.078 $\pm$ 0.0247 |               |                                        |                                        |                                        |
|                        |         | after  | 10       | 1.100 $\pm$ 0.0238 |               |                                        |                                        |                                        |
| 500                    | Sal-Ket | before | 11       | 1.078 $\pm$ 0.0159 | Two-way ANOVA | $F_{(1, 38)} = 0.8473$<br>$P = 0.3631$ | $F_{(1, 38)} = 2.472$<br>$P = 0.1242$  | $F_{(1, 38)} = 1.349$<br>$P = 0.2528$  |
|                        |         | after  | 11       | 1.081 $\pm$ 0.0131 |               |                                        |                                        |                                        |
|                        | Ket-Ket | before | 10       | 1.046 $\pm$ 0.0082 |               |                                        |                                        |                                        |
|                        |         | after  | 10       | 1.072 $\pm$ 0.0119 |               |                                        |                                        |                                        |



**Extended Data Fig. 4a,b**

| Pre-treatment | Perfusion | N number | Mean<br>±S.E.M | Statistics      | P-value<br>/Significance                                    |
|---------------|-----------|----------|----------------|-----------------|-------------------------------------------------------------|
| Sal(i.p.)     | ACSF      | 6        | 97.46 ± 2.112  | Unpaired t-test | Sal-ACSF vs Sal-Ket<br>$t_{(11)} = 4.207, P = 0.0015 / **$  |
|               | Ket       | 7        | 114 ± 3.158    |                 | Ket-ACSF vs Ket-Ket<br>$t_{(10)} = 5.528, P = 0.0003 / ***$ |
| Ket (i.p.)    | ACSF      | 6        | 97.7 ± 3.064   |                 | Sal-Ket vs Ket-Ket<br>$t_{(11)} = 3.465, P = 0.0053 / **$   |
|               | Ket       | 6        | 138.5 ± 6.717  |                 |                                                             |

**Extended Data Fig. 5a,b**

|                                   | Time   | Group | N number | Mean<br>±S.E.M | Statistics      | P-value<br>/Significance                   |
|-----------------------------------|--------|-------|----------|----------------|-----------------|--------------------------------------------|
| pCaMKII $\alpha$ /CaMKII $\alpha$ | 3 days | Sal   | 8        | 1.0 ± 0.0854   | Unpaired t-test | $t_{(14)} = 0.4369$<br>$P = 0.6688 / N.S.$ |
|                                   |        | Ket   | 8        | 1.064 ± 0.1178 |                 |                                            |
|                                   | 7 days | Sal   | 8        | 1.0 ± 0.1146   | Unpaired t-test | $t_{(14)} = 1.052$<br>$P = 0.3107 / N.S.$  |
|                                   |        | Ket   | 8        | 1.219 ± 0.1734 |                 |                                            |
| pCaMKII $\beta$ /CaMKII $\beta$   | 3 days | Sal   | 8        | 1.0 ± 0.1134   | Unpaired t-test | $t_{(14)} = 3.756$<br>$P = 0.0021 / **$    |
|                                   |        | Ket   | 8        | 1.638 ± 0.1264 |                 |                                            |
|                                   | 7 days | Sal   | 8        | 1.0 ± 0.1915   | Unpaired t-test | $t_{(14)} = 0.3796$<br>$P = 0.7100 / N.S.$ |
|                                   |        | Ket   | 8        | 1.116 ± 0.2385 |                 |                                            |
| pMeCP2/MeCP2                      | 3 days | Sal   | 9        | 1.0 ± 0.1889   | Unpaired t-test | $t_{(16)} = 2.332$<br>$P = 0.0331 / *$     |
|                                   |        | Ket   | 9        | 1.610 ± 0.1811 |                 |                                            |
|                                   | 7 days | Sal   | 8        | 1.0 ± 0.1894   | Unpaired t-test | $t_{(14)} = 2.440$<br>$P = 0.0286 / *$     |
|                                   |        | Ket   | 8        | 2.053 ± 0.3879 |                 |                                            |
| BDNF/GAPDH                        | 3 days | Sal   | 8        | 1.0 ± 0.0826   | Unpaired t-test | $t_{(14)} = 0.0433$<br>$P = 0.9661 / N.S.$ |
|                                   |        | Ket   | 8        | 1.007 ± 0.1401 |                 |                                            |

**Extended Data Fig. 6a**

| Time   | Group | N number | Mean<br>±S.E.M | Statistics      | P-value<br>/Significance           |
|--------|-------|----------|----------------|-----------------|------------------------------------|
| 7 days | Sal   | 10       | 131.4 ± 7.538  | Unpaired t-test | $t_{(17)} = 2.469, P = 0.0244 / *$ |
|        | SCA   | 9        | 92.78 ± 14.23  |                 |                                    |

**Extended Data Fig. 6b**

| Interstimulus interval | Group | N number | Mean<br>±S.E.M | Statistics        | P-value<br>/Significance                      |
|------------------------|-------|----------|----------------|-------------------|-----------------------------------------------|
| 20                     | Sal   | 24       | 1.4 ± 0.0430   | Mann-Whitney test | $U = 210, P = 0.0314 / *$                     |
|                        | SCA   | 27       | 1.276 ± 0.0287 |                   |                                               |
| 30                     | Sal   | 24       | 1.474 ± 0.0377 | Mann-Whitney test | $U = 207, P = 0.0270 / *$                     |
|                        | SCA   | 27       | 1.359 ± 0.0366 |                   |                                               |
| 50                     | Sal   | 24       | 1.476 ± 0.0358 | Unpaired t-test   | $t_{(49)} = 0.6624, P = 0.5108 / \text{N.S.}$ |
|                        | SCA   | 27       | 1.442 ± 0.0366 |                   |                                               |
| 100                    | Sal   | 24       | 1.448 ± 0.0312 | Mann-Whitney test | $U = 265, P = 0.2722 / \text{N.S.}$           |
|                        | SCA   | 27       | 1.403 ± 0.0293 |                   |                                               |
| 200                    | Sal   | 24       | 1.258 ± 0.0277 | Unpaired t-test   | $t_{(49)} = 1.137, P = 0.2612 / \text{N.S.}$  |
|                        | SCA   | 27       | 1.218 ± 0.0225 |                   |                                               |
| 400                    | Sal   | 24       | 1.103 ± 0.0247 | Unpaired t-test   | $t_{(49)} = 0.7955, P = 0.4302 / \text{N.S.}$ |
|                        | SCA   | 27       | 1.080 ± 0.0156 |                   |                                               |
| 500                    | Sal   | 24       | 1.074 ± 0.0195 | Unpaired t-test   | $t_{(49)} = 49, P = 0.3527 / \text{N.S.}$     |
|                        | SCA   | 27       | 1.052 ± 0.0134 |                   |                                               |

**Extended Data Fig. 7**

| Group    | N number | Mean<br>±S.E.M | Statistics      | P-value<br>/Significance                         |
|----------|----------|----------------|-----------------|--------------------------------------------------|
| ActD-Sal | 10       | 140 ± 5.534    | Unpaired t-test | $t_{(17)} = 1.006$<br>$P = 0.3286 / \text{N.S.}$ |
| ActD-SCA | 9        | 132.2 ± 5.348  |                 |                                                  |

**Extended Data Fig. 8**

| Group | N number | Mean<br>±S.E.M  | Statistics      | P-value<br>/Significance                          |
|-------|----------|-----------------|-----------------|---------------------------------------------------|
| Sal   | 8        | 1.0 ± 0.1685    | Unpaired t-test | $t_{(14)} = 0.0705$<br>$P = 0.9448 / \text{N.S.}$ |
| SCA   | 8        | 0.9833 ± 0.1658 |                 |                                                   |

**Extended Data Fig. 9**

| Time | Group | N number | Mean<br>±S.E.M  | Statistics            | P-value<br>/Significance                         |
|------|-------|----------|-----------------|-----------------------|--------------------------------------------------|
| 8 h  | Sal   | 8        | 1.0 ± 0.1218    | Welch's<br>correction | $t_{(9,272)} = 0.9004, P = 0.3907 / \text{N.S.}$ |
|      | SCA   | 8        | 1.290 ± 0.2983  |                       |                                                  |
| 24 h | Sal   | 7        | 1.0 ± 0.1756    | Unpaired t-test       | $t_{(12)} = 0.0677, P = 0.9472 / \text{N.S.}$    |
|      | SCA   | 7        | 0.9831 ± 0.1781 |                       |                                                  |

**Extended Data Fig. 10**

| Genotype        | Group | N number | Mean<br>±S.E.M  | Statistics       | Interaction                           | Genotype factor                       | Drug factor                          | P-value<br>/Significance                   |  |  |  |
|-----------------|-------|----------|-----------------|------------------|---------------------------------------|---------------------------------------|--------------------------------------|--------------------------------------------|--|--|--|
| CTL             | Sal   | 10       | 1.0 ± 0.0623    | Two-way<br>ANOVA | $F_{(1,33)} = 0.0467$<br>$P = 0.8302$ | $F_{(1,33)} = 0.3223$<br>$P = 0.5741$ | $F_{(1,33)} = 19.22$<br>$P = 0.0001$ | CTL-Sal vs CTL-<br>SCA<br>$P = 0.0207 / *$ |  |  |  |
|                 | SCA   | 9        | 1.318 ± 0.0913  |                  |                                       |                                       |                                      | KI-Sal vs KI-SCA<br>$P = 0.0184 / *$       |  |  |  |
| <i>Mecp2</i> KI | Sal   | 10       | 0.9402 ± 0.0399 |                  |                                       |                                       |                                      |                                            |  |  |  |
|                 | SCA   | 8        | 1.291 ± 0.0987  |                  |                                       |                                       |                                      |                                            |  |  |  |
